# Supplementary material
Source: PubMed Central journal article supplement (PMC8344384)
Supplement: NIHMS1546157-supplement-1.pdf [file NIHMS1546157-supplement-1.pdf]

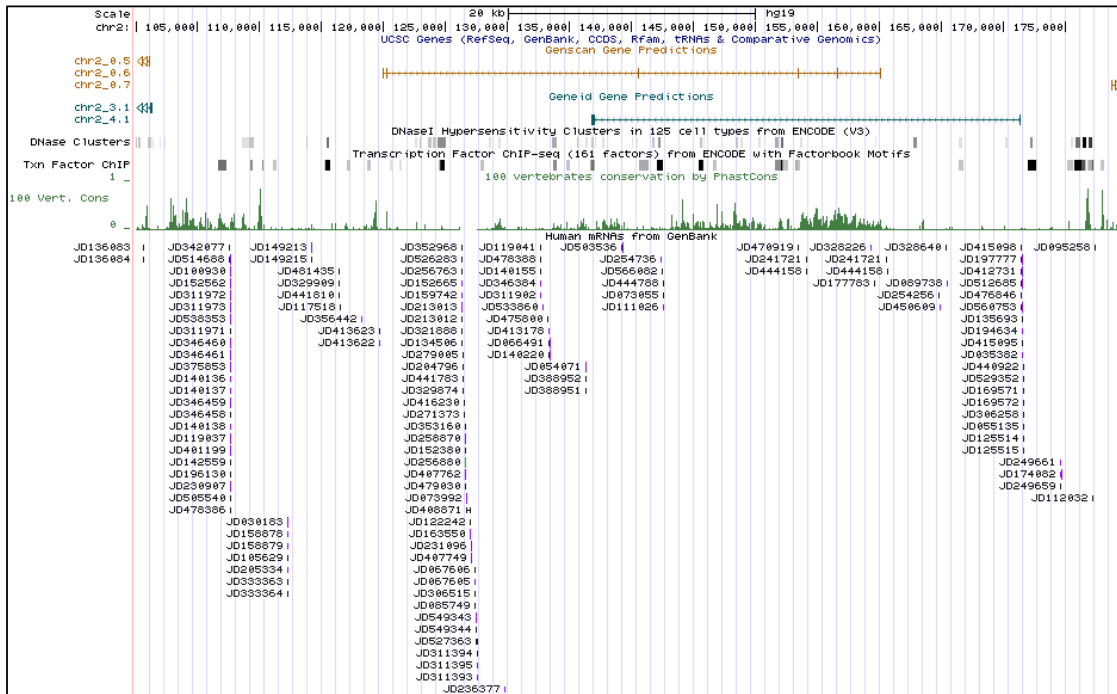

**Figure S1: Regulatory potential of the 80kb linkage disequilibrium (LD) region shown in the UCSC Genome Browser.**

There are five predicted genes in the region (tracks: Genscan Gene Predictions, Geneid Gene Predictions). There are also numerous DNase I hypersensitivity clusters and transcription factor binding sites as well as peaks of conservation (track: 100 vertebrates conservation by PhastCons) across the region. Finally, there are 132 predicted novel microRNAs in the region (track: Human mRNAs from GenBank).
